# Supplementary material for: Exposure to famine in early childhood increases the risk of edentulism: results 1 from the China Health and Retirement Longitudinal Study
Source: Research Square preprint supplement (doi:10.21203/rs.3.rs-6854061/v1), 2025-07-28
Supplement: Supplementary file 1 [file 59c9b5340942652625065a9c.docx]

Appendix List

**Table S1.** Characteristics of study participants.

**Table S2.** The prevalence of edentulism by province in China from CHARLS (2011-2012).

**Table S1.** Characteristics of study participants.

| **Variable** | **Total (n=17566)** | **Non-edentulism (n=16051)** | **Edentulism (n=1515)** | **p.value** |
| --- | --- | --- | --- | --- |
| **Age** | 58.49 ± 10.16 | 57.49 ± 9.61 | 69.10 ± 9.85 | <0.0001 |
| **Sex** |  |  |  | <0.001 |
| Female | 9148(52.08) | 8294(51.67) | 854(56.37) |  |
| Male | 8418(47.92) | 7757(48.33) | 661(43.63) |  |
| **Location** |  |  |  | <0.0001 |
| City/town | 3924(22.36) | 3657(22.80) | 267(17.64) |  |
| Village | 13627(77.64) | 12380(77.20) | 1247(82.36) |  |
| **Education** |  |  |  | <0.0001 |
| Elementary school | 3707(21.11) | 3419(21.31) | 288(19.02) |  |
| High school or above | 2215(12.61) | 2149(13.39) | 66(4.36) |  |
| Less than elementary school | 7986(45.48) | 6974(43.46) | 1012(66.84) |  |
| Middle school | 3652(20.80) | 3504(21.84) | 148(9.78) |  |
| **Marital** |  |  |  | <0.0001 |
| Married | 15336(87.31) | 14262(88.86) | 1074(70.89) |  |
| Separated/divorced/Widowed | 2071(11.79) | 1647(10.26) | 424(27.99) |  |
| Never married | 158(0.90) | 141(0.88) | 17(1.12) |  |
| **Income** |  |  |  | <0.0001 |
| >10000 | 2417(13.93) | 2370(14.96) | 47(3.12) |  |
| 0-10000 | 14934(86.07) | 13474(85.04) | 1460(96.88) |  |
| **Sleeping time** |  |  |  | <0.0001 |
| >8 h | 1373(8.53) | 1227(8.33) | 146(10.80) |  |
| ≤6 h | 8056(50.07) | 7308(49.59) | 748(55.33) |  |
| 6–8 h | 6660(41.39) | 6202(42.08) | 458(33.88) |  |
| **Smoking** |  |  |  | 0.07 |
| No | 10625(60.52) | 9743(60.73) | 882(58.29) |  |
| Yes | 6931(39.48) | 6300(39.27) | 631(41.71) |  |
| **Drinking Status** |  |  |  | <0.0001 |
| No | 11794(72.13) | 10678(71.63) | 1116(77.29) |  |
| Yes | 4557(27.87) | 4229(28.37) | 328(22.71) |  |
| **SBP** | 130.58 ± 21.52 | 130.01 ± 21.22 | 136.58 ± 23.69 | <0.0001 |
| **DBP** | 75.92 ± 12.18 | 76.05 ± 12.19 | 74.55 ± 11.92 | <0.0001 |
| **Waist** | 84.28 ± 12.63 | 84.48 ± 12.48 | 82.21 ± 13.95 | <0.0001 |
| **Hypertension** |  |  |  | <0.001 |
| No | 12924(74.04) | 11868(74.41) | 1056(70.12) |  |
| Yes | 4531(25.96) | 4081(25.59) | 450(29.88) |  |
| **Dyslipidaemia** |  |  |  | <0.01 |
| No | 15502(90.14) | 14144(89.95) | 1358(92.13) |  |
| Yes | 1696(9.86) | 1580(10.05) | 116(7.87) |  |
| **Diabetes** |  |  |  | 0.65 |
| No | 16332(93.90) | 14928(93.93) | 1404(93.60) |  |
| Yes | 1061(6.10) | 965(6.07) | 96(6.40) |  |
| **Liver disease** |  |  |  | 0.80 |
| No | 16820(96.53) | 15365(96.51) | 1455(96.68) |  |
| Yes | 605(3.47) | 555(3.49) | 50(3.32) |  |
| **Heart disease** |  |  |  | <0.01 |
| No | 15326(87.81) | 14038(88.03) | 1288(85.52) |  |
| Yes | 2127(12.19) | 1909(11.97) | 218(14.48) |  |
| **Stroke** |  |  |  | <0.0001 |
| No | 17026(97.22) | 15590(97.41) | 1436(95.29) |  |
| Yes | 486(2.78) | 415(2.59) | 71(4.71) |  |
| **Kidney disease** |  |  |  | <0.01 |
| No | 16460(94.39) | 15066(94.53) | 1394(92.87) |  |
| Yes | 979(5.61) | 872(5.47) | 107(7.13) |  |
| **Stomach or other digestive disease** |  |  |  | 0.69 |
| No | 13726(78.42) | 12550(78.46) | 1176(77.98) |  |
| Yes | 3777(21.58) | 3445(21.54) | 332(22.02) |  |
| **Memory related disease** |  |  |  | <0.0001 |
| No | 17162(98.11) | 15712(98.30) | 1450(96.09) |  |
| Yes | 331(1.89) | 272(1.70) | 59(3.91) |  |
| **Arthritis or rheumatism** |  |  |  | <0.0001 |
| No | 11807(67.42) | 10858(67.85) | 949(62.89) |  |
| Yes | 5705(32.58) | 5145(32.15) | 560(37.11) |  |
| **Pain** |  |  |  | <0.0001 |
| No | 11860(67.67) | 11017(68.79) | 843(55.83) |  |
| Yes | 5665(32.33) | 4998(31.21) | 667(44.17) |  |
| **Health status during childhood** |  |  |  | 0.03 |
| Excellent | 1661(9.63) | 1543(9.78) | 118(7.97) |  |
| Fair | 2991(17.33) | 2741(17.38) | 250(16.89) |  |
| Good | 4948(28.68) | 4478(28.39) | 470(31.76) |  |
| Poor | 1190(6.90) | 1086(6.88) | 104(7.03) |  |
| Very good | 6465(37.47) | 5927(37.57) | 538(36.35) |  |
| **Famine exposure** |  |  |  | <0.0001 |
| Non-exposed | 1836(10.45) | 1822(11.35) | 14(0.92) |  |
| Fetal exposed | 1271(7.24) | 1245(7.76) | 26(1.72) |  |
| Preschool exposed | 2631(14.98) | 2540(15.82) | 91(6.01) |  |
| School-age exposed | 2471(14.07) | 2314(14.42) | 157(10.36) |  |
| Other | 9357(53.27) | 8130(50.65) | 1227(80.99) |  |

**Table S2.** The prevalence of edentulism by province in China from CHARLS (2011-2012).

| **Provinces** | **Total** | **Edentulism** | **Prevalence (%)** |
| --- | --- | --- | --- |
| Beijing | 93 | 5 | 5.38% |
| Xinjiang | 105 | 14 | 13.33% |
| Guangxi | 603 | 70 | 11.61% |
| Guizhou | 194 | 9 | 4.64% |
| Liaoning | 529 | 29 | 5.48% |
| Zhejiang | 703 | 79 | 11.24% |
| Heilongjiang | 332 | 23 | 6.93% |
| Hunan | 805 | 29 | 3.60% |
| Guangdong | 965 | 87 | 9.02% |
| Shanghai | 60 | 5 | 8.33% |
| Shaanxi | 569 | 49 | 8.61% |
| Tianjin | 156 | 7 | 4.49% |
| Gansu | 435 | 56 | 12.87% |
| Fujian | 511 | 63 | 12.33% |
| Jiangsu | 869 | 60 | 6.90% |
| Shandong | 1455 | 127 | 8.73% |
| Inner Mongolia | 854 | 57 | 6.67% |
| Hebei | 746 | 49 | 6.57% |
| Yunnan | 1060 | 116 | 10.94% |
| Jilin | 433 | 44 | 10.12% |
| Shanxi | 536 | 82 | 15.36% |
| Jiangxi | 866 | 53 | 6.12% |
| Henan | 1385 | 128 | 9.24% |
| Hubei | 556 | 33 | 5.94% |
| Sichuan | 1510 | 140 | 9.27% |
| Anhui | 848 | 55 | 6.49% |
| Chongqing | 230 | 36 | 15.65% |
| Qinghai | 153 | 10 | 6.54% |
